# Supplementary material for: Development of an RT-LAMP Assay for the Rapid Detection of SFTS Virus
Source: MDPI journal article supplement (doi:10.3390/v13040693), 2021-04-16
Supplement: s1 [file s1]

Figure S1

| Serum ID | RT-LAMP    |                | qPCR Log <sub>10</sub> (viral<br>RNA copy<br>numbers/mL) | Conventional<br>PCR |
|----------|------------|----------------|----------------------------------------------------------|---------------------|
|          | Simplified | RNA extraction |                                                          |                     |
| 218A1    | +          | +              | 9.2                                                      | +                   |
| 107A     | +          | +              | 5.6                                                      | +                   |
| 108A     | +          | +              | 6.0                                                      | +                   |
| 112A     | +          | +              | 4.8                                                      | +                   |
| 192A     | +          | +              | 4.5                                                      | +                   |
| 194A     | +          | +              | 5.0                                                      | +                   |
| 198A     | +          | +              | 7.8                                                      | +                   |
| 106A     | +          | +              | 5.5                                                      | +                   |
| 117A2    | +          | +              | 7.8                                                      | +                   |
| M13-17   | +          | +              | 4.9                                                      | +                   |
| M13-22   | +          | +              | 5.0                                                      | +                   |
| M13-24   | +          | +              | 4.9                                                      | +                   |
| M13-35   | +          | +              | 6.0                                                      | +                   |
| M14-01   | +          | +              | 6.0                                                      | +                   |
| M14-10   | +          | +              | 6.3                                                      | +                   |
| M14-11   | +          | +              | 6.0                                                      | +                   |
| M14-25   | +          | +              | 6.0                                                      | +                   |
| K3       | +          | +              | 5.1                                                      | +                   |
| K5       | +          | +              | 3.6                                                      | +                   |
| K8       | +          | +              | 5.7                                                      | +                   |
| K9       | +          | +              | 4.5                                                      | +                   |
| K10      | +          | +              | 4.2                                                      | +                   |
| K11      | +          | +              | 4.8                                                      | +                   |
| K12      | +          | +              | 7.1                                                      | +                   |
| K13      | +          | +              | 3.9                                                      | +                   |
| K14      | +          | +              | 5.5                                                      | +                   |
| K15      | +          | +              | 5.6                                                      | +                   |
| K16      | +          | +              | 3.0                                                      | +                   |
| S1       | +          | +              | 6.2                                                      | +                   |
| S2       | +          | +              | 5.3                                                      | +                   |
| S3       | +          | +              | 5.6                                                      | +                   |
| S4       | +          | +              | 6.5                                                      | +                   |
| S5       | +          | +              | 5.9                                                      | +                   |
| S6       | +          | +              | 4.0                                                      | +                   |
| S7       | +          | +              | 5.2                                                      | +                   |
| S8       | +          | +              | 4.1                                                      | +                   |
| Y1       | +          | +              | 3.6                                                      | +                   |
| Y2       | +          | +              | 5.1                                                      | +                   |
| Y3       | +          | —              | 1.8                                                      | —                   |
| Y4       | +          | +              | 5.8                                                      | +                   |
| Y5       | +          | +              | 2.9                                                      | +                   |
| Y6       | +          | +              | 4.3                                                      | +                   |
| Y7       | +          | +              | 4.8                                                      | +                   |
| Y8       | +          | +              | —                                                        | +                   |
| Y9       | +          | +              | 1.9                                                      | +                   |
| Y10      | +          | +              | —                                                        | +                   |
| Y11      | +          | +              | 6.0                                                      | +                   |

**Supplementary Figure S1.** Detection of SFTSV in serum samples using the RT-LAMP, qRT-PCR, and conventional RT-PCR assays.

Figure S1  
(Continued)

| Serum ID | RT-LAMP    |                | qPCR Log <sub>10</sub> (viral<br>RNA copy<br>numbers/mL) | Conventional<br>PCR |
|----------|------------|----------------|----------------------------------------------------------|---------------------|
|          | Simplified | RNA extraction |                                                          |                     |
| 186A     | —          | +              | 6.4                                                      | +                   |
| 221A     | —          | +              | 3.5                                                      | +                   |
| 200A     | —          | +              | 3.0                                                      | +                   |
| 109A     | —          | —              | —                                                        | —                   |
| 102A     | —          | —              | —                                                        | —                   |
| 103A     | —          | —              | —                                                        | —                   |
| M14-02   | —          | —              | —                                                        | —                   |
| M14-03   | —          | —              | —                                                        | —                   |
| M14-04   | —          | —              | —                                                        | —                   |
| M14-05   | —          | —              | —                                                        | —                   |
| M14-07   | —          | —              | —                                                        | —                   |
| M13-23   | —          | —              | 3.1                                                      | +                   |
| M13-31   | —          | +              | 5.0                                                      | +                   |
| M14-19   | —          | —              | 2.4                                                      | +                   |
| K1       | —          | —              | —                                                        | —                   |
| K2       | —          | —              | —                                                        | —                   |
| K4       | —          | —              | —                                                        | —                   |
| K6       | —          | —              | —                                                        | —                   |
| K7       | —          | —              | 2.9                                                      | +                   |
| S9       | —          | —              | —                                                        | —                   |
| S10      | —          | —              | —                                                        | —                   |
| S11      | —          | —              | —                                                        | —                   |
| S12      | —          | —              | —                                                        | —                   |
| S13      | —          | +              | 3.6                                                      | —                   |
| Y15      | —          | —              | —                                                        | —                   |

**Supplementary Figure S1 (continued).** Detection of SFTSV in serum samples using the RT-LAMP, qRT-PCR, and conventional RT-PCR assays.
